# Supplementary material
Source: publisher site journal article supplement (http://www.kjim.org/upload/media/kjim-2020-064-suppl4.pdf)
Supplement: Supplementary file 1 [file kjim-2020-064-suppl4.pdf]

**Supplementary Table 4. Immunosuppressive medications administered to patients with AAV with and without mortality**

| Immunosuppressive medications | Patients with mortality (n = 15) | Patients without mortality (n = 102) | p value |
|-------------------------------|----------------------------------|--------------------------------------|---------|
| Glucocorticoid                | 14 (93.3)                        | 92 (90.2)                            | 0.999   |
| Cyclophosphamide              | 6 (40.0)                         | 53 (52.0)                            | 0.389   |
| Mycophenolate mofetil         | 2 (13.3)                         | 8 (7.8)                              | 0.615   |
| Azathioprine                  | 4 (26.7)                         | 37 (36.3)                            | 0.571   |
| Tacrolimus                    | 2 (13.3)                         | 4 (3.9)                              | 0.170   |
| Rituximab                     | 3 (20.0)                         | 8 (7.8)                              | 0.149   |
| Methotrexate                  | 1 (6.7)                          | 5 (4.9)                              | 0.569   |

Values are expressed as number (%).

AAV, anti-neutrophil cytoplasmic antibody-associated vasculitis.
